# Supplementary material for: Study of new metallomacrocyclic Pd(ii) complexes based on hybrid pyrazole sulfoxide/sulfone ligands and their contribution to supramolecular networks
Source: Royal Society of Chemistry journal article supplement (doi:10.1039/c2ce26687c), 2012-12-19

**Supplementary Material (ESI) for CrystEngComm**

**Study of new metallomacrocyclic Pd(II) complexes based on hybrid  
pyrazole sulfoxide/sulfone ligands and their contribution to  
supramolecular networks**

**Antonio de LEÓN, Miguel GUERRERO, Jordi GARCÍA-ANTÓN, Josep ROS,  
Mercè FONT-BARDÍA, Josefina PONS**

### S1. NMR spectrum of the monomeric complex **1**.

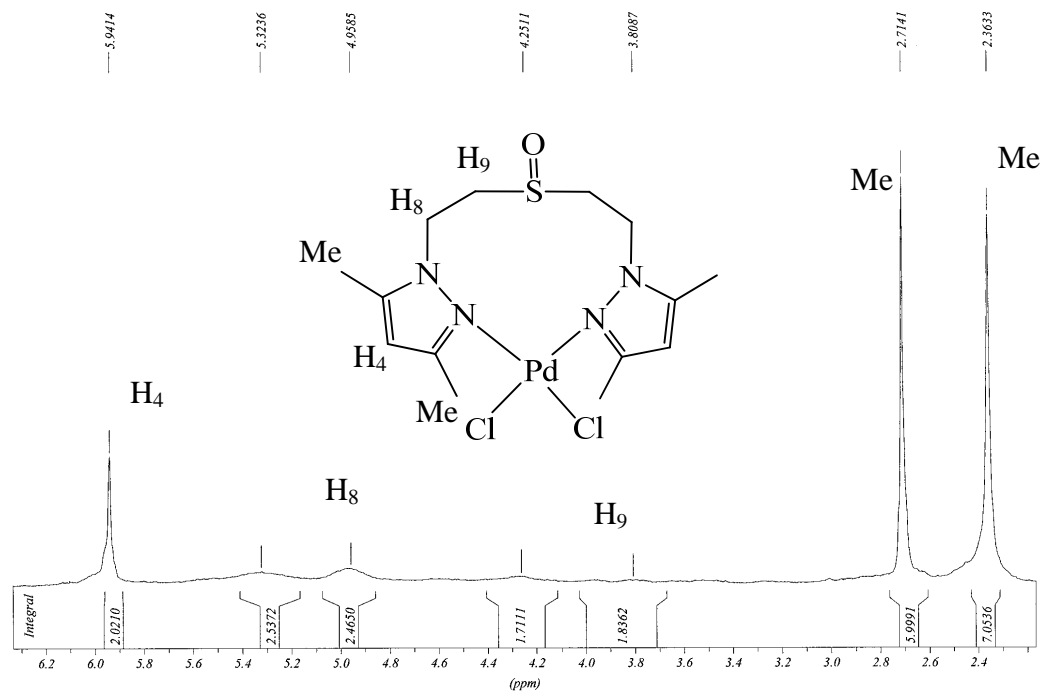

## S2. NMR spectrum of the dimeric complex **2**.

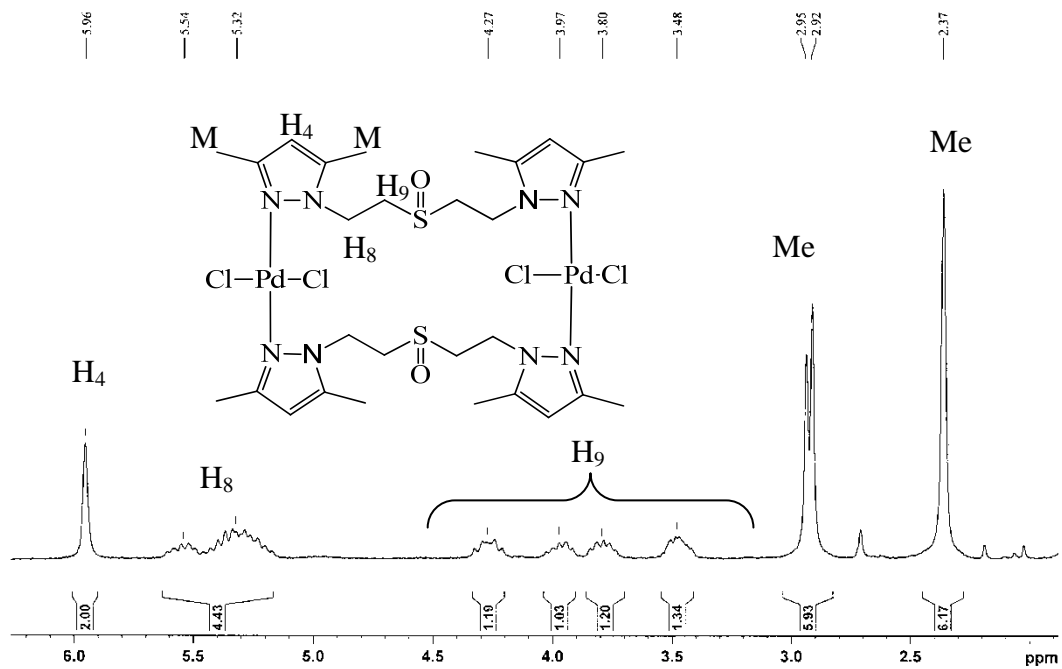

**S3.** NMR spectrum of the monomeric complex **3**.

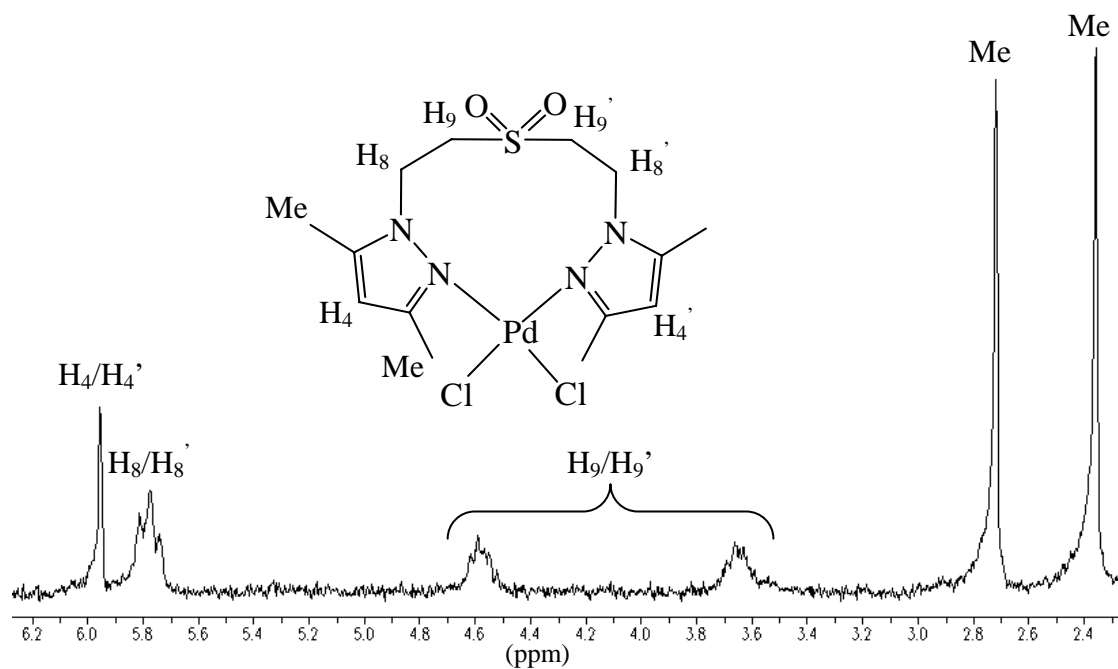

**S4.** NMR spectrum of the dimeric complex **4**.

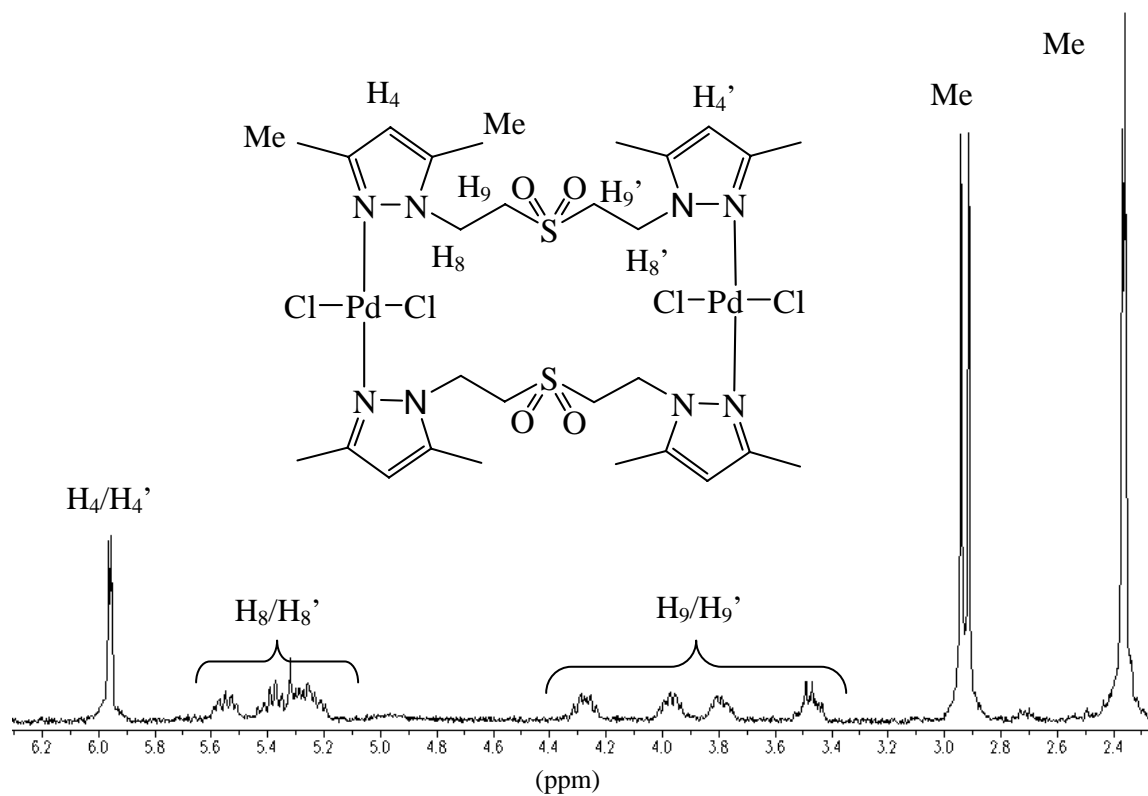

Supplement: c2ce26687c.pdf [file c2ce26687c.pdf]
